# Supplementary material for: To Take the Stairs or Not to Take the Stairs? Employing the Reflective–Impulsive Model to Predict Spontaneous Physical Activity
Source: Sports (Basel). 2017 Sep 29;5(4):75. doi: 10.3390/sports5040075 (PMC5969035; doi:10.3390/sports5040075)
Supplement: Supplementary file 1 [file sports-05-00075-s001.xlsx]

## Sheet: Sheet1
Participant_ID	Stairs=0, Elevator = 1	Reflections Toward Spontaneous Physical Activity (Drive or Walk/Bike)	Reflections Toward Spontaneous Physical Activity (Sit vs. Stand)	Reflections Toward Spontaneous Physical Activity (Park Closest to Destination--Reversed Scored)	Age	Sex (Male = 0, Female = 1)	BMI	Have Access to Car (0 = No, 1 = Yes)	Have Access to Bike (0 = No, 1 = Yes)	IPAQ: Vigorous Execise Days Per Week	IPAQ: Vigorous Execise Time Per Session	IPAQ: Moderate Execise Days Per Week	IPAQ: Moderate Execise Time Per Session	IPAQ: Walking Days Per Week	IPAQ: Walking Time Per Session	IPAQ: Time Seated	SCS Item 1	SCS Item 2	SCS Item 3	SCS Item 4	SCS Item 5	SCS Item 6	SCS Item 7	SCS Item 8	SCS Item 9	SCS Item 10	SCS Item 11	SCS Item 12	SCS Item 13	Was Stairs-Elevator Choice Part of Study (0 = Yes, 1 = No)	If Knew Stairs-Elevator Choice Was Part of Study, Did This Influence Decision (0 = Yes, 1 = No)	Impulses Toward Physical Activity (Lower Scores = Higher Impulse)	Impulses Toward Sedentary Behavior (Lower Scores = Higher Impulse)	Color Blind (0 = No, 1 = Yes)	Stroop
1	1	53	65	35	20	0	24.39	1	1	2	90	4	45	5	30	180	4	3	3	4	4	4	2	3	4	4	5	5	4	1	1	-14.5	-95.5	0	85.1832
2	0	100	105	59	19	0	19.11	1	1	7	90	7	90	5	60		2	4	5	4	5	5	4	2	4	4	4	4	4	1	1	-69	-53.5	0	356.328
3	0	70	31	66	20	0	21.7	1	1	3	45	3	20	7	180	360	3	2	3	5	5	3	1	2	2	4	3	3	3	1	1	-99.5	45.5	0	274.652
4	1	54	40	56	18	1	21.14	1	0	3	30	4	120	7	180	360	3	4	5	4	4	3	5	4	4	5	4	4	4	1	1	-26	-79	0	110.243
5	1	77	53	30	22	1	22.14	1	0	5	38	3	20	7	60	600	4	4	4	4	4	2	4	4	3	3	4	4	4	1	1	-36	-33	0	219.776
6	1	98	57	21	18	1	20.5	1	0	4	60			7	30	120	3	3	4	4	4	4	3	3	3	2	4	3	3	1	1	50	-100.5	0	277.545
7	1	104	67	55	18	1	20.05	1	1	2	30	4	45	7	120	420	4	4	4	4	4	4	3	3	2	4	5	4	4	1	1	-5.4	-104	0	186.364
8	0	109	54	110	21	0	22.03	1	0	5	45	7	180	6	120	600	4	2	5	3	4	4	3	3	2	3	4	5	4	1	1	-38	-178	0	55.1475
9	1	90	89	91	18	0	23.05	1	1	4	90	3	120	7	60	360	4	4	5	4	4	4	4	4	4	2	4	4	3	1	1	-66	1	0	112.893
10	0	109	74	57	25	1	26.45	1	1	1	60	5	60	7	60	600	4	5	5	5	5	3	4	5	2	2	5	3	5	1	1	-161	-90	0	101.312
11	0	27	10	17	20	0	23.63	1	1	4	120	1	30	5	15	240	3	2	3	1	2	2	2	2	4	3	5	3	2	1	1			0	294.942
12	1	110	55	5	19	0	23.05	0	1	6	120	7	60	7	180	420	5	4	4	5	5	4	5	4	5	5	5	5	5	1	1	-91.5	107	0	318.717
13	1	16	17	25	20	0	22.8	1	0	0	0	0	0	5	45	300	3	2	3	2	5	5	2	2	3	2	3	4	5	1	1	130.5	-58	0	121.752
14	1	110	56	89	21	0	24.89	1	0	5	35	3	10	5	85	840	4	4	4	5	5	5	2	3	4	4	3	4	4	1	1	-19	14	0	17.1535
15	1	102	12	10	24	1	33.83	1	0	0	0	0	0	5	45	540	5	2	3	5	5	3	1	2	1	3	4	4	5	1	1	-36.5	-4.5	0	109.969
16	0	85	59	44	21	1	21.25	1	1	3	60	7	90	7	105	0	5	3	4	4	3	4	3	3	2	1	3	3	5	1	1	-125.5	-35.5	0	16.4485
17	0	75	56	79	22	1	22.59	1	0	3	60	3	30	6	120	420	2	2	4	4	3	3	2	2	2	1	5	3	4	1	1	-390.5	-86	0	67.0543
18	0	88	80	87	18	1	22.14	1	1	4	60	4	60	7	150	270	3	4	5	4	3	3	4	4	3	2	3	4	4	1	1	-27	95.5	0	309.029
19	1	110	45	39	23	1	34.17	1	1	1	45	3	60	7	120	600	2	3	2	5	4	3	2	3	1	2	2	5	4	1	1	-50	31	0	178.875
20	0	86	44	27	19	1	20.6	1	0	3	60	4	30	6	30	360	3	4	3	4	3	3	3	1	3	4	4	4	4	1	1	-60	36.5	0	124.011
21	0	88	54	16	20	1	20.36	1	0	4	30	4	30	7	90	240	3	1	4	4	2	2	2	3	2	3	4	3	4	1	1	-29	-44	0	94.9056
22	1	102	51	97	22	1	24.14	1	0	4	90	0	0	5	240	0	4	3	4	5	4	4	2	2	5	5	4	5	5	1	1	31	-93	0	67.6857
23	0	32	25	14	22	1	18.56	1	0	0	0	2	60	5	30	420	3	4	4	5	3	3	2	3	3	4	4	5	5	1	1	-150.5	183.5	0	410.067
24	0	109	54	86	20	1	22.8	1	1	5	60	2	60	6	180	600	4	5	5	5	5	5	3	1	4	3	4	4	4	1	1	-39	-113.5	0	134.8
25	0	105	66	94	19	1	18.73	0	0	3	60	3	60	7	0	600	5	2	3	5	2	4	1	3	2	2	4	4	5	1	1	-150	-206.5	0	99.7447
26	0	110	20	23	19	1	21.21	0	1	0	0	0	0	7	75	480	2	1	1	5	4	4	2	2	1	1	4	2	5	1	1	-481	-99	0	74.7879
27	1	90	0	0	20	0	24.27	1	1	6	240	7	300	6	480	360	5	4	5	5	5	4	5	5	3	2	5	5	5	1	1	-228	144	0	190.767
28	1	85	49	25	19	0	23.73	1	1	3	90	7		5	20	0	3	3	3	4	2	2	2	2	3	4	4	3	3	1	1	-34.5	-195	0	117.212
29	1	110	70	83	22	1	21.61	1	1	5	60	5	45	7	120	0	4	4	4	4	3	3	2	3	3	4	4	5	4	1	1	-73	9	0	364.867
30	1	95	76	45	19	1	21.25	1	0	0	0	0	0	7	120	420	4	4	3	2	2	3	1	3	2	1	4	3	4	1	1	-45.5	-181.5	0	308.135
31	1	96	16	8	22	0	22.38	1	1	4	120	4	60	7	30	300	4	2	4	5	4	4	3	4	3	4	3	5	5	1	1	-185	116.5	0	178.578
32	0	33	35	44	21	0	24.41	1	0	3	40	4	30	5	0	300	3	3	3	4	4	4	2	2	4	4	4	4	5	1	1	-53	-4.5	0	286.111
33	1	109	106	0	21	0	21.92	0	0	0	0	0	0	7	30	300	3	2	2	1	2	5	3	3	3	1	3	2	4	1	1	-107.5	-77.5	0	185.688
34	1	110	110	79	18	1	20.36	1	0	2	150	5	150	7	60	300	5	4	4	5	5	5	3	5	4	3	5	5	5	1	1	-94	-5.5	0	186.339
35	0	104	6	9	19	0	21.85	0	0	3	180	0	0	6	35	420	3	2	1	2	2	3	1	2	1	1	3	2	4	1	1	-28	-94	0	172.359
36	1	105	100	107	22	0	19.26	1	0	3	60	5	120	5	90	360	3	4	4	1	2	3	2	4	2	3	5	4	5	1	1	8.5	-5	0	166.879
37	0	110	99	20	20	1	18.88	1	1	5		5		6		0	4	2	4	4	3	4	3	3	4	4	4	3	4	1	1	-126.5	-44.5	0	254.007
38	0	99	75	87	22	1	22.63	1	1	4	75	3	120	7	240	240	4	2	4	4	3	3	1	3	1	1	4	4	4	1	1	-47	42.5	0	184.052
39	0	83	7	4	19	1	20.12	1	0	0	0	5	90	7	300	720	3	2	3	4	1	3	4	2	2	3	4	3	4	0	1	-112	-38	0	107.91
40	0	110	83	22	21	1	20.12	1	0	2	60	5	120	7	60	180	4	2	4	3	3	3	4	2	2	2	3	4	3	1	1	-24.5	-19.5	0
41	1	94	19	11	20	1	22.04	1	0	2	10	3	20	6	60	720	4	2	4	1	1	3	4	2	2	2	3	5	4	1	1	-37.5	-73.5	0	83.2364
42	1	76	53	32	19	1	31	1	0	3	60	2	60	6	30	240	3	3	4	3	1	2	2	3	1	2	3	3	3	1	1	26	-62	0	58.4695
43	1	104	84	4	22	0	24.4	1	1	3	45	5	120	7	30	60	3	2	4	2	3	3	2	3	2	3	5	3	1	1	1	-90.5	-15	0	276.896
44	0	62	30	89	22	1	24.21	1	0	3	45	3	30	7	120	360	3	3	5	4	2	3	1	2	5	5	5	5	5	1	1	-156	180.5	0	193.96
45	1	109	110	68	21	0	25.77	1	1	6	90	7		7		240	5	5	4	4	2	3	5	4	5	2	3	5	2	1	1	-4	25.5	0	744.692
46	1	89	14	79	20	1	19.75	1	0	2	60	3	120	7	60	210	3	4	5	4	3	3	4	4	3	3	4	4	2	1	1	-27	-109	0	142.169
47	1	104	83	55	18	1	22.46	1	0	0	0	3	45	1	120	60	4	5	3	5	5	5	3	2	2	2	5	5	4	1	1	-2.5	25	0	72.7923
48	0	46	77	49	20	1	20.17	1	0	2	25	3	30	5	30	300	4	2	4	5	5	2	2	3	2	2	3	5	5	1	1	-112	-59.5	0	325.667
49	1	96	29	84	22	1	22.49	1	0	5	120			7	60	240	4	1	4	1	3	3	4	4	1	1	5	5	4	1	1	17.5	207	0	600.432
50	1	74	56	0	20	1	29.95	1	0	3	30	3	15	1	120		3	2	3	3	3	1	2	1	2	3	3	5	3	1	1	-188	-30.5	0	267.667
51	0	110	44	45	22	0	18.3	1	1	5	90	2	30	7	60	300	3	4	5	2	4	2	4	3	2	4	1	4	5	1	1	21	-88	0	188.427
52	1	110	76	30	18	0	21.77	1	1	3	60	5	30	7	30	360	4	3	4	3	4	4	1	4	3	4	4	4	4	1	1	-15	-21.5	0	-41.4508
53	1	103	55	7	19	1	21.41	0	1	2	120	3	120	5	60	360	4	3	3	2	3	4	5	4	2	3	4	2	5	1	1	-66	0	0	159.622
54	0	78	56	29	22	0	44.85	1	0	2	60	2	30	4	15	900	3	3	3	2	2	3	4	3	4	5	4	5	4	1	1	-191	-19	0	378.587
55	0	89	56	86	20	1	22.14	1	1	2	60	2	30	6	90	600	4	2	4	5	4	4	1	1	3	1	3	5	4	1	1	-192.5	34	0	124.398
56	0	76	110	92	22	0	26.83	1	0	3	50	2	10	5	15	300	3	2	3	3	3	4	2	2	3	4	3	4	4	1	1	20	-55	1	131.752
57	1	88	60	46	27	1	19.37	1	0	2	60	2	30	5	300		4	2	4	4	4	2	2	3	3	3	4	4	4	1	1	-170.5	-125	0	115.065
58	0	109	110	0	20	1	22.49	1	1	2	30	5	60	6	60	480	4	1	4	4	5	2	1	3	3	1	4	3	2	1	1	-34.5	22	0	92.23
59	1	95	24	26	24	1	20.36	1	0	1	45	6	120	7	120	240	5	3	5	4	4	4	4	4	5	2	3	4	3	1	1	-174.5	138.5	0	350.136
60	0	103	80	65	25	1	27.39	1	0	3	60	2	60	6		45	4	4	4	5	3	5	4	2	5	4	5	5	5	1	1	-311	-194	0	101.312
61	0	82	21	86	21	1	18.13	1	1	2	120	1	120	4	480	180	4	3	4	3	5	5	5	3	3	2	4	1	2	0	1	-137	108	0	327.694
62	1	90	24	9	20	1	21.92	1	0	2	60	2	60	7	180	300	5	4	4	4	4	3	4	3	3	4	4	4	4	1	1	-151	-23	0	367.527
63	1	89	69	11	20	1	23.29	1	1	1	60	2	60	7	60	420	4	4	3	4	2	2	2	3	2	2	4	3	4	1	1	-33	87.5	0	155.604
64	0	81	65	61	22	0	26.54	1	0	2	45	3	60	5			4	3	3	4	4	3	1	3	2	1	3	4	3	1	1	-46	87	0	186.071
65	0	93	55	0	23	0	23.05	1	1	4		4		3	25	480	4	4	5	5	5	5	3	4	4	3	3	3	4	1	1	1.5	-154	0	176.888
66	1	39	24	20	20	1	20.98	1	0	0	0	1	30	2	15	900	3	2	2	3	2	3	2	2	2	2	3	3	3	1	1	-48	24.5	0	107.34
67	0	80	102	82	23	1	20.67	1	1	5	90	6	120	2	15	180	3	2	4	2	3	2	2	2	2	4	4	4	4	1	1	-0.5	-58	0	291.567
68	1	90	15	27	19	0	28.79	1	0	3	90	6	120	6		240	5	4	5	5	5	4	5	4	3	5	4	5	4	1	1	-150	67	0	132.783
69	1	98	5	8	21	1	22.14	1	0	1	20	4	30	4	10	420	4	3	4	4	5	1	3	3	3	2	5	4	4	1	1	-94	-15.5	0	91.3042
70	0	56	105	109.4	20	1	21.25	1	0	5	60	6	120	7	120	420	3	4	4	4	3	2	4	3	3	4	4	3	4	1	1	-114	-101	0	164.77
71	0	101	5	109.4	21	1	23.17	1	1	3	90	4	60	7	120	45	5	5	3	5	5	1	5	5	5	5	5	5	5	1	1	-180	-51.5	0	53.6444
72	0	101	74	10	20	1	20.17	1	0	4	105	3	30	5	20	120	4	4	4	5	5	5	3	4	4	3	5	4	5	1	1	-95.5	-49	0	90.6817
73	0	110	98	110	23	1	22.96	1	1	5	60	5	60	7	180	300	4	3	5	4	4	4	3	4	3	2	4	4	4	1	1	-34.5	-30	0	268.405
74	0	109	55	58	19	1	28.19	1	0	1	45	2	10	6	60		3	2	3	4	4	2	1	4	2	3	4	3	4	1	1	-42.5	-117.5	0	153.139
75	1	96	55	0	20	0	20.75	1	0	3	120	5	120	5	30	360	2	2	3	2	3	1	4	2	3	2	3	2	2	1	1	151	-216	0	-9.46594
76	0	102	21	10	20	1	20.6	1	0	3	60	2	30	5	15	420	4	2	4	4	2	3	2	2	2	2	4	5	5	1	1	-51.5	-68.5	0	16.4136
77	1	110	0	72	20	1	32.89	0	1	5	120	2	30	7	60	480	4	2	4	1	3	4	3	2	2	5	5	4	5	1	1	-60	86.5	0	248.818
78	1	110	74	34	19	1	25.69	1	0	3	120	7	60	7	180	60	3	2	4	4	2	2	1	3	2	1	3	4	3	1	1	-58	3	0	302.857
79	1	110	48	55	21	0	31.32	1	1	5	120	2	60	7	210	190	1	5	5	4	3	2	4	3	2	3	5	4	4	1	1	-87.5	67	0	172.548
80	1	53	51	100	22	0	24.33	1	0	4	30	4	30	7		30	3	4	4	4	4	4	4	3	4	4	4	4	4	1	1	-64	-3.5	0	193.451
81	0	104	55	5	19	1	21.63	1	1	4	60	7	120	7	120	300	5	4	4	5	4	2	5	4	2	3	5	5	5	1	1	-65	16.5	0	-7.10606
82	0	106	107	66	22	1	18.71	1	1	7	60	7	60	7	90		5	3	5	4	4	2	3	5	2	3	5	1	3	1	1	-141.5	-36	0	19.0929
83	1	91	28	53	20	1	25.23	1	1	3	30	3	30	5	25	240	5	3	3	3	3	3	4	3	4	2	4	4	4	1	1	71.5	0	0	98.2518
84	1	106	71	110	23	1	28.06	1	0	4	60	5		6			3	3	4	3	3	3	1	2	5	5	5	5	4	1	1	-17	-2	0	-20.238
85	0	107	3	4	19	1	22.15	1	1	0	0	4	30	5	60	360	4	2	2	5	4	3	2	3	2	1	2	4	2	1	1	-50.5	-141.5	0	86.1946
86	1	57	91	54	20	1	34.94	1	0	0	0	0	0	5	120	360	2	2	2	4	4	2	1	1	4	1	3	3	4	1	1	-163	-12.5	0	182.952
87	0	63	42	27	18	1	17.91	1	1	1	45	1	45	7	60	360		6	6	6	6		6		6	6		6	6	1	1	-61	54	1	525.787
88	0	94	110	78	22	0	25.54	1	0	2	120	5	360	7	180	120	4	4	4	2	1	2	1	4	3	1	2	5	4	1	1	-6.5	-26	0	409.592
89	1	25	19	0	29	0	25.54	1	0	3	178	4	480	5	275		2	1	3	3	3	4	2	3	1	1	5	2	2	1	1	-102	42	0	200.944
90	1	99	56	2	19	1	21.14	1	0	6	120	6	120	5	120	30	5	3	5	5	5	5	2	5	3	2	5	4	5	1	1	202	-136	0
91	1	99	50	28	20	1	19.27	1	1	4	60	3	20	7	20	480	3	2	5	4	2	2	4	2	3	5	4	4	5	1	1	-198	-52	0	110.482
92	1	100	61	17	22	1	25.74	1	1	3	45	2	60	7	120	240	4	4	4	3	3	3	3	3	2	3	3	4	4	1	1	-143.5	103	0	222.937
93	1	64	22	24	19	1	19.76	1	0	0	0	4	60	5	30	240	3	1	1	3	4	4	1	1	1	3	3	2	4	1	1	1.5	35.5	0	155.65
94	0	75	75	82	23	0	32.28	1	1	3	90	2	60	6			4	3	3	3	4	4	2	2	4	3	4	4	4	1	1	100.5	-89	0	489.868
95	0	74		24	21	1	25.06	1	0	2	60	3	120	5	15	600	3	3	3	4	3	2	1	3	2	1	3	3	4	1	1	-23.5	0	0	90.2222
96	0	87	79	73	19	1	19.48	1	1	4	120	5	60	5			4	3	3	4	4	3	4	3	4	4	5	4	3	1	1	-96.5	-84.5	0	91.8667
97	1	77	79	28	20	1	29.12	1	0	3	90	4		7	60	540	4	4	2	1	3	3	4	3	3	5	4	5	4	1	1	-56.5	90.5	0	100.114
98	0	70	55	0	21	1	23.4	1	0	3	40	2	20	4	60		4	3	4	4	4	4	1	4	4	4	4	4	4	1	1	16	-54	0	88.0852
99	1	89	72	64	22	1	27.19	1	1	2	30	4	60	5	45	240	4	4	4	2	4	4	1	3	2	4	4	3	4	1	1	-33.5	46.5	0	175.107
100	1	110	25	31	19	1	23.67	1	1	5	90	5	60	0	0	360	3	3	2	4	3	2	1	3	3	2	4	4	5	1	1	-252	-83.5	0	90.3753
101	0	65	75	40	21	0	24.34	1	0	7	60	2	120	5	60		4	3	4	2	4	4	2	3	2	3	4	4	2	1	1	-52	20	0	96.4778
102	0	90	99	109.5	23	0	27.19	1	1	2	60	4	120	7	150	600	3	2	2	2	3	4	1	2	1	2	5	4	3	1	1	-71.5	19.5	0	217.116
103	1	92	57	53	20	1	19.13	1	0	3	80	2	60	7	15	240	4	4	4	5	3	4	4	4	4	4	4	4	4	1	1	-128.5	96	0	166.652
104	0	106	59	27	21	1	24.56	1	1	3	120	4	60	7	60	240	3	3	5	5	3	3	3	4	3	2	4	4	4	1	1	73.5	-108	0	-6.05416
105	0	82	55	86	22	0	35.73	1	1	1	30	2	45	3	60	180	2	2	4	3	1	1	1	1	4	4	4	4	4	1	1	45	145	0	531.756
106	1	80	50	95	20	1	30.89	1	0	2	10	2	30	7	20	420	5	2	2	4	5	5	1	2	2	3	3	4	5	1	1	-141.5	-21	0	133.883
107	0	100	50	3	19	1	23.29	1	0	4	90	5	30	5	30	240	4	3	3	4	3	3	2	2	1	2	3	5	5	1	1	-36.5	-50	0	945.332
108	0	60	85	27	21	0	25.1	1	0	5	150	5	60	7	30	420	4	4	5	3	5	4	4	3	4	4	4	5	4	1	1	-52	-18.5	1	335.759
109	1	90	45	71	20	1	20.34	1	1	5	60	5	60	7	60	60	5	1	5	3	3	3	1	3	1	1	5	5	3	1	1	-72	51.5	0	425.402
110	0	76	52	85	19	0	22.31	1	0	3	90	0	0	5	60	600	4	3	4	2	3	4	3	2	4	4	3	5	4	1	1	-68.5	-30.5	0	124.718
111	1	105	25	25	19	1	23.17	0	0	0	0	5	120	7	60	420	4	3	3	2	2	3	1	2	3	3	4	4	3	1	1	-70	-100.5	0	104.699
112	1	18	5	16	20	1	19.37	1	1	0	0	0	0	5	20	720	5	2	4	5	4	4	5	5	5	5	4	5	5	1	1	46.5	-60	0	120.592
113	0	93	54	73	21	1	18.89	1	0	5	60	2	60	6	50	240	4	4	5	5	5	5	4	4	3	4	3	4	5	1	1	-86.5	-122.5	0	266.157
114	1	80	58	36	19	1	24.27	1	0	3	60	2	60	5	30	420	2	1	3	5	5	5	1	3	3	3	4	4	4	1	1	25.5	-152.5	0	347.016
115	1	93	60	67	22	1	16.95	1	0	6	120	7	240	7	120	720	3	1	4	3	2	3	1	1	2	3	5	5	5	1	1	-149	-32	0	102.968
116	0	67	33	27	20	0	25.11	1	0	0	0	2	60	2	120	300	5	5	4	4	2	3	5	4	4	4	4	5	3	1	1	-68	6	0	139.441
117	1	78	11	10	19	0	22.8	1	1	0	0	6	60	7	60	540	3	2	1	2	1	2	3	2	1	5	2	2	3	1	1	-47	-62	0	85.3541
118	1	101	100	15	18	1	29.53	0	0	3	20	0	0	6	50		2	4	5	4	4	4	2	1	3	5	1	5	2	1	1	4.5	19	0	88.7503
119	1	89	65	110	23	1		0	1	2	40	4	35	6	70	420	1	4	3	5	2	3	1	2	3	1	4	3	4	1	1			0	330.326
120	1	76	38	33	23	1	26.83	1	0	0	0	0	0	6	120	240	3	2	4	4	3	3	2	3	2	4	4	3	4	1	1	-19	-12	0	167.694
121	0	70	83	58	23	1	22.48	1	1	4	30	3	45	7	10	300	4	5	4	5	5	1	3	3	3	4	4	5	5	1	1	-182	178.5	0	116.368
122	0	87	19	0	20	0	21.7	1	0	4	90	5	120	7	45	330	3	4	3	4	2	3	2	2	2	3	5	3	3	1	1	83.5	-197.5	0	324.329
123	1	105	10	4	22	1	19.84	1	0	4	165	1	45	6	240	240	5	5	5	4	4	1	4	1	5	5	5	5	5	1	1	-24.5	-45.5	0	405.051
124	0	43	22	32	18	1	25.85	1	1	3	45	5		7	20	180	2	1	4	5	2	2	1	1	3	4	2	4	3	1	1	118.5	-78	0	114.46
125	0	105	32	27	18	1	19.2	1	0	1	120	7	60	7	60	420	4	2	3	4	3	2	2	3	2	1	3	5	5	1	1	80	-68.5	0	255.037
126	0	90	65	68	22	1	21.25	1	0	4	90	0	0	6	120	300	5	3	5	4	5	4	5	4	4	2	4	5	4	1	1	65.5	-100.5	0	172.185
127	1	98	57	38	18	1	22.31	1	0	4	90	5	60	7	240	300	3	4	4	4	3	4	5	4	2	3	4	3	4	1	1	-18	-34	0	-15.5112
